# Supplementary material for: Chemical modification of Nafion membranes by protic ionic liquids: the key role of ionomer–cation interactions
Source: Royal Society of Chemistry journal article supplement (doi:10.1039/c4sm01473a), 2014-08-04
Supplement: c4sm01473a1.pdf [file c4sm01473a1.pdf]

Electronic Supplementary Information for

**Chemical Modification of Nafion Membranes by Protic Ionic Liquids:  
the Key Role of Ionomer-Cation Interaction**

Fei Lu, Xinpei Gao, Shuting Xie, Nan Sun, Liqiang Zheng\*

*Key laboratory of Colloid and Interface Chemistry, Shandong University, Ministry of  
Education, Jinan, 250100, P. R. China*

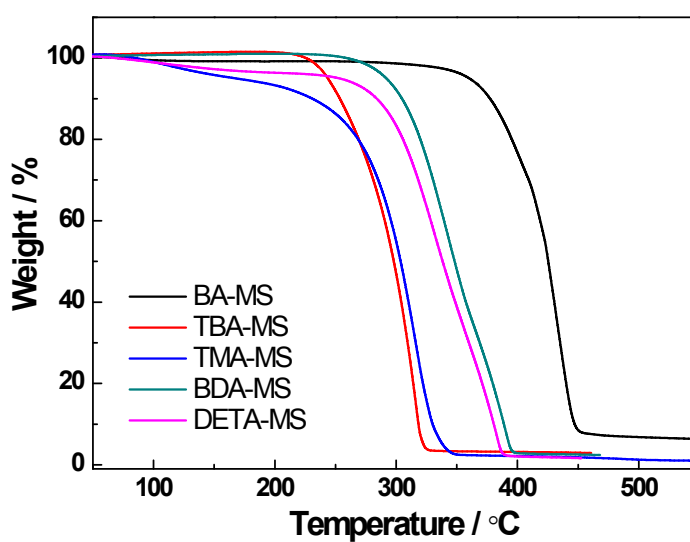

**Figure S1.** TGA curves for the pure PILs.
